# Supplementary material
Source: publisher figshare collection journal article supplement (https://asha.figshare.com/articles/dataset/_/6972857)
Supplement: Supplementary file 1 [file 1]

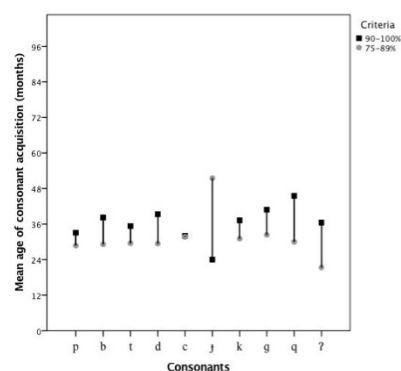

### Plosive

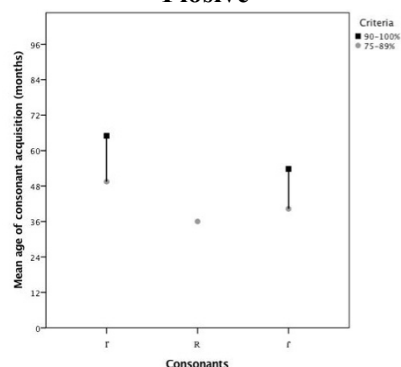

### Trill, tap, and flap

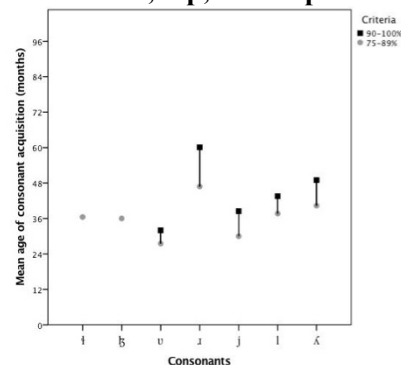

### Approximant and lateral

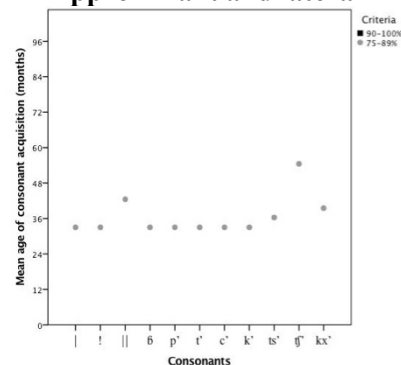

### Non-pulmonic

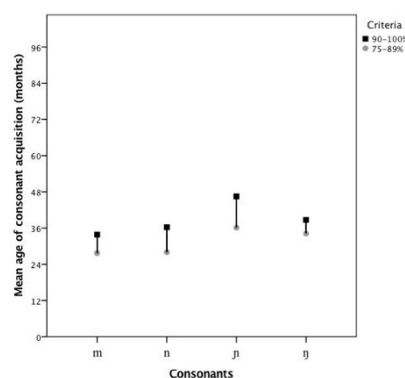

### Nasal

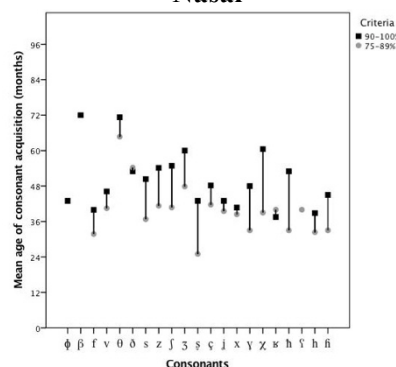

### Fricative

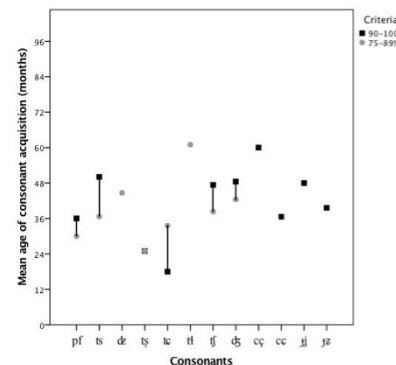

### Affricate

**Supplemental Material S2.** Mean age (in months) of acquisition of consonant phonemes across all languages organized by manner of articulation using 75–85% and 90–100% criteria. Reprinted with permission from McCleod and Crowe (2018).
