# Supplementary material
Source: publisher figshare collection journal article supplement (https://asha.figshare.com/articles/dataset/_/6972857)
Supplement: Supplementary file 3 [file 1]

**Supplemental Material S1.** Average age of acquisition of pulmonic and nonpulmonic consonants across studies.

| 75–89% criteria |                  |                    |                |                   |                   |                                                                                          | 90–100% criteria |                    |                |                   |                   |                                                                                                    |
|-----------------|------------------|--------------------|----------------|-------------------|-------------------|------------------------------------------------------------------------------------------|------------------|--------------------|----------------|-------------------|-------------------|----------------------------------------------------------------------------------------------------|
| Consonant       | Mean<br>(months) | Median<br>(months) | SD<br>(months) | Range<br>(months) | No. of<br>studies | Languages <sup>a</sup>                                                                   | Mean<br>(months) | Median<br>(months) | SD<br>(months) | Range<br>(months) | No. of<br>studies | Languages <sup>a</sup>                                                                             |
| <b>Plosives</b> |                  |                    |                |                   |                   |                                                                                          |                  |                    |                |                   |                   |                                                                                                    |
| p               | 28.71            | 28.00              | 8.28           | 13–48             | 35                | ara, cmn, dan, deu, ell, eng, fra, hat, isl, jam, kor, mlt, nld, pot, slv, swa, tur, xho | 33.08            | 35.00              | 10.10          | 15–60             | 36                | afr, ara, cmn, dan, deu, ell, eng, fra, heb, hun, isl, ita, jpn, msa, nld, pot, slv, spa, tur, yue |
| p*              | 25.50            | 27.00              | 10.25          | 12–36             | 4                 | kor                                                                                      | —                | —                  | —              | —                 | —                 | —                                                                                                  |
| p <sup>h</sup>  | 31.10            | 30.00              | 8.75           | 18–43             | 10                | cmn, ell, isl, kor, tsn, xho                                                             | 39.00            | 39.00              | 2.12           | 37–42             | 5                 | cmn, isl, yue                                                                                      |
| b               | 29.16            | 30.00              | 8.87           | 12–48             | 31                | ara, dan, deu, ell, eng, fra, hat, jam, mlt, nld, pot, slv, swa, tsn, tur, xho           | 38.21            | 36.00              | 12.52          | 15–72             | 33                | afr, ara, dan, deu, ell, eng, fra, heb, hun, ita, jpn, msa, nld, pot, spa, tur                     |
| <sup>m</sup> b  | 24.00            | 24.00              | —              | —                 | 1                 | ell                                                                                      | —                | —                  | —              | —                 | —                 | —                                                                                                  |
| b:              | —                | —                  | —              | —                 | —                 | —                                                                                        | 46.00            | 46.00              | —              | —                 | 1                 | ara                                                                                                |
| t               | 29.50            | 28.50              | 11.31          | 12–72             | 36                | ara, cmn, dan, deu, ell, eng, fra, hat, isl, jam, kor, mlt, nld, pot, slv, swa, tur, xho | 35.33            | 36.00              | 10.97          | 15–60             | 40                | afr, ara, cmn, dan, deu, ell, eng, fra, heb, hun, isl, ita, jpn, msa, nld, pot, slv, spa, tur, yue |
| t*              | 25.50            | 27.00              | 10.25          | 12–36             | 4                 | kor                                                                                      | —                | —                  | —              | —                 | —                 | —                                                                                                  |

| 75–89% criteria  |                  |                    |                |                   |                   |                                                                                                         | 90–100% criteria |                    |                |                   |                   |                                                                                                           |
|------------------|------------------|--------------------|----------------|-------------------|-------------------|---------------------------------------------------------------------------------------------------------|------------------|--------------------|----------------|-------------------|-------------------|-----------------------------------------------------------------------------------------------------------|
| Consonant        | Mean<br>(months) | Median<br>(months) | SD<br>(months) | Range<br>(months) | No. of<br>studies | Languages <sup>a</sup>                                                                                  | Mean<br>(months) | Median<br>(months) | SD<br>(months) | Range<br>(months) | No. of<br>studies | Languages <sup>a</sup>                                                                                    |
| t <sup>h</sup>   | 32.30            | 33.00              | 9.87           | 18–49             | 10                | cmn, ell, isl,<br>kor, tsn, xho                                                                         | 39.40            | 40.00              | 13.70          | 18–54             | 5                 | cmn, isl, yue                                                                                             |
| t <sup>ʃ</sup>   | 36.00            | 36.00              | —              | —                 | 1                 | ara                                                                                                     | 55.00            | 55.00              | —              | —                 | 1                 | ara                                                                                                       |
| t <sup>wh</sup>  | 42.00            | 42.00              | —              | —                 | 1                 | tsn                                                                                                     | —                | —                  | —              | —                 | —                 | —                                                                                                         |
| t: <sup>ʃh</sup> | —                | —                  | —              | —                 | —                 | —                                                                                                       | 46.00            | 46.00              | —              | —                 | 1                 | ara                                                                                                       |
| d                | 29.39            | 30.00              | 8.16           | 12–48             | 31                | ara, dan, deu,<br>ell, eng, fra,<br>hat, jam, mlt,<br>nld, pot, slv,<br>swa, tsn, tur,<br>xho           | 39.31            | 36.00              | 12.82          | 15–72             | 36                | afr, ara, dan, deu,<br>ell, eng, fra, heb,<br>hun, ita, jpn, msa,<br>nld, pot, slv, spa,<br>tur           |
| <sup>n</sup> d   | 28.00            | 28.00              | —              | —                 | 1                 | ell                                                                                                     | —                | —                  | —              | —                 | —                 | —                                                                                                         |
| t                | —                | —                  | —              | —                 | —                 | —                                                                                                       | —                | —                  | —              | —                 | —                 | —                                                                                                         |
| d                | —                | —                  | —              | —                 | —                 | —                                                                                                       | —                | —                  | —              | —                 | —                 | —                                                                                                         |
| c                | 31.67            | 28.00              | 10.02          | 24–43             | 3                 | ell, isl                                                                                                | 32.00            | 32.00              | 11.31          | 24–40             | 2                 | isl, tur                                                                                                  |
| c <sup>h</sup>   | 56.00            | 56.00              | 22.63          | 40–72             | 2                 | isl, xho                                                                                                | 40.00            | 40.00              | —              | —                 | 1                 | isl                                                                                                       |
| tʃ               | 51.50            | 55.00              | 20.60          | 24–72             | 4                 | ell, tur, xho                                                                                           | 24.00            | 24.00              | —              | —                 | 1                 | tur                                                                                                       |
| <sup>n</sup> tʃ  | 32.00            | 32.00              | —              | —                 | 1                 | ell                                                                                                     | —                | —                  | —              | —                 | —                 | —                                                                                                         |
| k                | 31.06            | 30.00              | 8.67           | 15–48             | 36                | ara, cmn, dan,<br>deu, ell, eng,<br>fra, hat, isl,<br>jam, kor, mlt,<br>nld, pot, slv,<br>swa, tur, xho | 37.26            | 36.00              | 10.29          | 18–60             | 39                | afr, ara, cmn, dan,<br>deu, ell, eng, fra,<br>heb, hun, isl, ita,<br>jpn, msa, pot, slv,<br>spa, tur, yue |
| k*               | 27.00            | 30.00              | 11.49          | 12–36             | 4                 | kor                                                                                                     | —                | —                  | —              | —                 | —                 | —                                                                                                         |





| 75–89% criteria   |                  |                    |                |                   |                   |                                                                                          | 90–100% criteria |                    |                |                   |                   |                                                                                |
|-------------------|------------------|--------------------|----------------|-------------------|-------------------|------------------------------------------------------------------------------------------|------------------|--------------------|----------------|-------------------|-------------------|--------------------------------------------------------------------------------|
| Consonant         | Mean<br>(months) | Median<br>(months) | SD<br>(months) | Range<br>(months) | No. of<br>studies | Languages <sup>a</sup>                                                                   | Mean<br>(months) | Median<br>(months) | SD<br>(months) | Range<br>(months) | No. of<br>studies | Languages <sup>a</sup>                                                         |
| <b>Fricatives</b> |                  |                    |                |                   |                   |                                                                                          |                  |                    |                |                   |                   |                                                                                |
| ϕ                 | —                | —                  | —              | —                 | —                 | —                                                                                        | 43.00            | 45.00              | 6.63           | 34–48             | 4                 | jpn                                                                            |
| β                 | —                | —                  | —              | —                 | —                 | —                                                                                        | 72.00            | 72.00              | —              | —                 | 1                 | spa                                                                            |
| f                 | 31.76            | 32.00              | 5.92           | 18–43             | 33                | ara, cmn, dan, deu, ell, eng, fra, hat, isl, jam, mlt, nld, pot, slv, swa, tsn, tur, xho | 39.93            | 40.00              | 9.97           | 19–66             | 30                | afr, ara, cmn, dan, deu, ell, eng, fra, heb, hun, isl, pot, slv, spa, tur, yue |
| v                 | 40.48            | 36.00              | 17.86          | 20–102            | 25                | dan, deu, ell, eng, fra, hat, jam, mlt, nld, pot, slv, swa, tur, xho                     | 46.18            | 48.00              | 15.42          | 19–78             | 17                | afr, dan, deu, ell, eng, fra, heb, hun, pot, tur                               |
| θ                 | 64.70            | 63.00              | 21.01          | 28–102            | 10                | ara, ell, eng, swa                                                                       | 71.29            | 72.00              | 11.47          | 55–90             | 7                 | ara, eng                                                                       |
| ð                 | 54.25            | 48.00              | 24.32          | 24–96             | 12                | dan, ell, eng, swa                                                                       | 53.00            | 51.50              | 18.49          | 24–84             | 10                | ara, dan, ell, eng, spa                                                        |
| ð <sup>c</sup>    | 36.00            | 36.00              | —              | —                 | 1                 | ara                                                                                      | 46.00            | 46.00              | —              | —                 | 1                 | ara                                                                            |
| ð̥                | 72.00            | 72.00              | —              | —                 | 1                 | ara                                                                                      | —                | —                  | —              | —                 | —                 | —                                                                              |
| ð̥̥               | 40.00            | 40.00              | —              | —                 | 1                 | isl                                                                                      | —                | —                  | —              | —                 | —                 | —                                                                              |
| s                 | 36.76            | 36.00              | 12.06          | 18–60             | 34                | ara, cmn, dan, deu, ell, eng, hat, isl, jam, kor, mlt, nld, pot, swa, tsn, tur, xho      | 50.36            | 48.00              | 18.56          | 16–90             | 28                | ara, cmn, dan, deu, ell, eng, heb, hun, jpn, msa, pot, spa, tur, yue           |

| 75–89% criteria |                  |                    |                |                   |                   |                                                                     | 90–100% criteria |                    |                |                   |                   |                                                   |
|-----------------|------------------|--------------------|----------------|-------------------|-------------------|---------------------------------------------------------------------|------------------|--------------------|----------------|-------------------|-------------------|---------------------------------------------------|
| Consonant       | Mean<br>(months) | Median<br>(months) | SD<br>(months) | Range<br>(months) | No. of<br>studies | Languages <sup>a</sup>                                              | Mean<br>(months) | Median<br>(months) | SD<br>(months) | Range<br>(months) | No. of<br>studies | Languages <sup>a</sup>                            |
| s*              | 36.00            | 36.00              | —              | —                 | 1                 | kor                                                                 | —                | —                  | —              | —                 | —                 | —                                                 |
| ʒ               | 72.00            | 72.00              | —              | —                 | 1                 | ara                                                                 | —                | —                  | —              | —                 | —                 | —                                                 |
| s <sup>f</sup>  | 40.00            | 40.00              | —              | —                 | 1                 | ara                                                                 | —                | —                  | —              | —                 | —                 | —                                                 |
| s <sup>w</sup>  | 36.00            | 36.00              | —              | —                 | 1                 | tsn                                                                 | —                | —                  | —              | —                 | —                 | —                                                 |
| z               | 41.29            | 36.00              | 16.19          | 18–84             | 24                | ara, deu, ell,<br>eng, fra, hat,<br>jam, pot, swa,<br>tur, xho      | 54.17            | 54.00              | 20.18          | 24–90             | 18                | afr, deu, eng, fra,<br>heb, hun, jpn, pot,<br>tur |
| ʃ               | 40.75            | 42.00              | 10.87          | 20–60             | 24                | ara, deu, eng,<br>fra, hat, jam,<br>mlt, pot, swa,<br>tsn, tur, xho | 54.87            | 54.00              | 16.01          | 30–90             | 15                | afr, ara, deu, eng,<br>heb, hun, pot, tur         |
| ʒ               | 47.85            | 48.00              | 14.29          | 28–84             | 13                | eng, fra, hat,<br>pot, tur                                          | 60.00            | 66.00              | 16.16          | 36–78             | 9                 | eng, hun, pot, spa,<br>tur                        |
| ʒ               | 25.00            | 25.00              | —              | —                 | 1                 | cmn                                                                 | 43.00            | 43.00              | —              | —                 | 1                 | cmn                                               |
| ʒ               | —                | —                  | —              | —                 | —                 | —                                                                   | —                | —                  | —              | —                 | —                 | —                                                 |
| ç               | 41.67            | 40.00              | 6.66           | 36–49             | 3                 | deu, ell, isl                                                       | 48.20            | 48.00              | 0.45           | 48–49             | 6                 | deu, ell, jpn                                     |
| ɟ               | 39.50            | 39.50              | 4.95           | 36–43             | 2                 | ell                                                                 | 43.00            | 43.00              | —              | —                 | 1                 | ell                                               |
| ç               | 28.00            | 30.00              | 9.17           | 18–36             | 3                 | cmn, dan                                                            | 45.71            | 52.00              | 15.72          | 18–66             | 7                 | cmn, dan, jpn                                     |
| ʒ               | —                | —                  | —              | —                 | —                 | —                                                                   | —                | —                  | —              | —                 | —                 | —                                                 |
| x               | 38.42            | 36.00              | 13.24          | 18–72             | 12                | ara, cmn, deu,<br>ell, pot, slv, tsn,<br>xho                        | 40.70            | 42.50              | 15.13          | 18–60             | 10                | afr, cmn, deu, ell,<br>heb, pot, slv, spa         |
| x <sup>w</sup>  | 42.00            | 42.00              | —              | —                 | 1                 | tsn                                                                 | —                | —                  | —              | —                 | —                 | —                                                 |
| ɣ               | 33.00            | 32.00              | 7.07           | 24–43             | 5                 | ell, tur, xho                                                       | 48.00            | 48.00              | —              | —                 | 1                 | tur                                               |



| 75–89% criteria   |                  |                    |                |                   |                   |                                                                                               | 90–100% criteria |                    |                |                   |                   |                                                                                          |
|-------------------|------------------|--------------------|----------------|-------------------|-------------------|-----------------------------------------------------------------------------------------------|------------------|--------------------|----------------|-------------------|-------------------|------------------------------------------------------------------------------------------|
| Consonant         | Mean<br>(months) | Median<br>(months) | SD<br>(months) | Range<br>(months) | No. of<br>studies | Languages <sup>a</sup>                                                                        | Mean<br>(months) | Median<br>(months) | SD<br>(months) | Range<br>(months) | No. of<br>studies | Languages <sup>a</sup>                                                                   |
| j                 | 30.00            | 30.00              | 9.27           | 12–48             | 27                | ara, dan, deu, eng, fra, hat, isl, jam, mlt, nld, slv, swa, tsn, tur, xho                     | 38.48            | 36.00              | 10.50          | 15–60             | 33                | afr, ara, dan, deu, eng, heb, hun, isl, jpn, msa, nld, slv, spa, tur, yue                |
| ɥ                 | —                | —                  | —              | —                 | —                 | —                                                                                             | —                | —                  | —              | —                 | —                 | —                                                                                        |
| l                 | 37.65            | 36.00              | 12.95          | 19–72             | 37                | ara, cmn, dan, deu, ell, eng, fra, hat, isl, jam, kor, mlt, nld, pot, slv, swa, tsn, tur, xho | 43.56            | 44.00              | 12.99          | 21–78             | 32                | afr, ara, cmn, dan, deu, ell, eng, fra, heb, hun, isl, ita, msa, pot, slv, spa, tur, yue |
| lʷ                | 36.00            | 36.00              | —              | —                 | 1                 | tsn                                                                                           | —                | —                  | —              | —                 | —                 | —                                                                                        |
| ɮ                 | —                | —                  | —              | —                 | —                 | —                                                                                             | 30.00            | 30.00              | —              | —                 | 1                 | tur                                                                                      |
| ʌ                 | 40.33            | 36.00              | 7.51           | 36–49             | 3                 | ell, pot                                                                                      | 49.00            | 49.00              | —              | —                 | 1                 | ell                                                                                      |
| ɫ                 | —                | —                  | —              | —                 | —                 | —                                                                                             | —                | —                  | —              | —                 | —                 | —                                                                                        |
| w                 | 30.33            | 30.00              | 5.94           | 16–36             | 21                | ara, dan, eng, fra, hat, jam, mlt, swa, tsn, xho                                              | 40.92            | 41.00              | 10.32          | 24–60             | 24                | ara, dan, eng, fra, jpn, msa, spa, yue                                                   |
| ɥ                 | 42.00            | 42.00              | 8.49           | 36–48             | 2                 | fra, hat                                                                                      | 39.00            | 39.00              | 12.73          | 30–48             | 2                 | ara, fra                                                                                 |
| <b>Affricates</b> |                  |                    |                |                   |                   |                                                                                               |                  |                    |                |                   |                   |                                                                                          |
| pf                | 30.00            | 30.00              | —              | —                 | 1                 | deu                                                                                           | 36.00            | 36.00              | —              | —                 | 1                 | deu                                                                                      |
| ts                | 36.67            | 36.00              | 6.03           | 31–43             | 3                 | cmn, deu, ell                                                                                 | 50.09            | 49.00              | 9.89           | 30–66             | 11                | cmn, deu, ell, heb, hun, jpn, yue                                                        |



| 75–89% criteria  |                  |                    |                |                   |                   |                                                   | 90–100% criteria |                    |                |                   |                   |                                           |
|------------------|------------------|--------------------|----------------|-------------------|-------------------|---------------------------------------------------|------------------|--------------------|----------------|-------------------|-------------------|-------------------------------------------|
| Consonant        | Mean<br>(months) | Median<br>(months) | SD<br>(months) | Range<br>(months) | No. of<br>studies | Languages <sup>a</sup>                            | Mean<br>(months) | Median<br>(months) | SD<br>(months) | Range<br>(months) | No. of<br>studies | Languages <sup>a</sup>                    |
| ts <sup>h</sup>  | 34.33            | 36.00              | 3.79           | 30–37             | 3                 | cmn, tsn, xho                                     | 50.75            | 50.00              | 2.36           | 49–54             | 4                 | cmn, yue                                  |
| ts <sup>hw</sup> | 36.00            | 36.00              | —              | —                 | 1                 | tsn                                               | —                | —                  | —              | —                 | —                 | —                                         |
| dz               | 44.67            | 43.00              | 3.79           | 42–49             | 3                 | ell, xho                                          | —                | —                  | —              | —                 | —                 | —                                         |
| tʂ               | 25.00            | 25.00              | —              | —                 | 1                 | cmn                                               | 25.00            | 25.00              | —              | —                 | 1                 | cmn                                       |
| tʂ <sup>h</sup>  | 25.00            | 25.00              | —              | —                 | 1                 | cmn                                               | 37.00            | 37.00              | —              | —                 | 1                 | cmn                                       |
| ɬ                | 33.60            | 36.00              | 9.10           | 18–42             | 5                 | cmn, kor                                          | 18.00            | 18.00              | —              | —                 | 1                 | cmn                                       |
| ɬ*               | 36.00            | 36.00              | 0.00           | 36                | 4                 | kor                                               | —                | —                  | —              | —                 | —                 | —                                         |
| ɬ <sup>h</sup>   | 32.40            | 36.00              | 8.05           | 18–36             | 5                 | cmn, kor                                          | 18.00            | 18.00              | —              | —                 | 1                 | cmn                                       |
| tɰ               | 61.00            | 61.00              | —              | —                 | 1                 | xho                                               | —                | —                  | —              | —                 | —                 | —                                         |
| tɰ <sup>h</sup>  | 36.00            | 36.00              | —              | —                 | 1                 | tsn                                               | —                | —                  | —              | —                 | —                 | —                                         |
| tɰ <sup>wh</sup> | 42.00            | 42.00              | —              | —                 | 1                 | tsn                                               | —                | —                  | —              | —                 | —                 | —                                         |
| tʃ               | 38.33            | 36.00              | 10.72          | 20–54             | 18                | ara, eng, jam,<br>mlt, pot, swa,<br>tur, xho      | 47.38            | 48.00              | 10.68          | 24–72             | 16                | ara, eng, heb, hun,<br>msa, pot, spa, tur |
| tʃ <sup>h</sup>  | 39.50            | 39.50              | 4.95           | 36–43             | 2                 | tsn, xho                                          | —                | —                  | —              | —                 | —                 | —                                         |
| dʒ               | 42.42            | 42.00              | 14.25          | 20–84             | 19                | ara, eng, hat,<br>jam, mlt, pot,<br>tsn, tur, xho | 48.50            | 48.00              | 12.12          | 24–72             | 12                | eng, msa, pot, spa,<br>tur                |
| dʒ <sup>w</sup>  | 42.00            | 42.00              | —              | —                 | 1                 | tsn                                               | —                | —                  | —              | —                 | —                 | —                                         |
| cç               | —                | —                  | —              | —                 | —                 | —                                                 | 60.00            | 60.00              | —              | —                 | 1                 | hun                                       |
| cç               | —                | —                  | —              | —                 | —                 | —                                                 | 36.60            | 36.00              | 6.99           | 29–48             | 5                 | jpn                                       |
| ʃɰ               | —                | —                  | —              | —                 | —                 | —                                                 | 48.00            | 48.00              | —              | —                 | 1                 | hun                                       |
| ʃz               | —                | —                  | —              | —                 | —                 | —                                                 | 39.60            | 40.00              | 6.07           | 32–48             | 5                 | jpn                                       |

| 75–89% criteria   |                  |                    |                |                   |                   |                        | 90–100% criteria |                    |                |                   |                   |                        |
|-------------------|------------------|--------------------|----------------|-------------------|-------------------|------------------------|------------------|--------------------|----------------|-------------------|-------------------|------------------------|
| Consonant         | Mean<br>(months) | Median<br>(months) | SD<br>(months) | Range<br>(months) | No. of<br>studies | Languages <sup>a</sup> | Mean<br>(months) | Median<br>(months) | SD<br>(months) | Range<br>(months) | No. of<br>studies | Languages <sup>a</sup> |
| kx <sup>hw</sup>  | 36.00            | 36.00              | —              | —                 | 1                 | tsn                    | —                | —                  | —              | —                 | —                 | —                      |
| <b>Clicks</b>     |                  |                    |                |                   |                   |                        |                  |                    |                |                   |                   |                        |
| ǀ                 | —                | —                  | —              | —                 | —                 | —                      | —                | —                  | —              | —                 | —                 | —                      |
|                   | 33.00            | 33.00              | 4.24           | 30–36             | 2                 | xho                    | —                | —                  | —              | —                 | —                 | —                      |
| <sup>h</sup>      | 36.00            | 36.00              | —              | —                 | 1                 | xho                    | —                | —                  | —              | —                 | —                 | —                      |
| !                 | 33.00            | 33.00              | 4.24           | 30–36             | 2                 | xho                    | —                | —                  | —              | —                 | —                 | —                      |
| ! <sup>h</sup>    | 49.00            | 49.00              | —              | —                 | 1                 | xho                    | —                | —                  | —              | —                 | —                 | —                      |
| ǀ                 | —                | —                  | —              | —                 | —                 | —                      | —                | —                  | —              | —                 | —                 | —                      |
|                   | 42.50            | 42.50              | 0.71           | 42–43             | 2                 | xho                    | —                | —                  | —              | —                 | —                 | —                      |
| <sup>h</sup>      | 36.00            | 36.00              | —              | —                 | 1                 | xho                    | —                | —                  | —              | —                 | —                 | —                      |
| <b>Implosives</b> |                  |                    |                |                   |                   |                        |                  |                    |                |                   |                   |                        |
| ɓ                 | 33.00            | 33.00              | 4.24           | 30–36             | 2                 | xho                    | —                | —                  | —              | —                 | —                 | —                      |
| <b>Ejectives</b>  |                  |                    |                |                   |                   |                        |                  |                    |                |                   |                   |                        |
| p’                | 33.00            | 33.00              | 4.24           | 30–36             | 2                 | tsn, xho               | —                | —                  | —              | —                 | —                 | —                      |
| t’                | 33.00            | 33.00              | 4.24           | 30–36             | 2                 | tsn, xho               | —                | —                  | —              | —                 | —                 | —                      |
| t <sup>w’</sup>   | 36.00            | 36.00              | —              | —                 | 1                 | tsn                    | —                | —                  | —              | —                 | —                 | —                      |
| c’                | 33.00            | 33.00              | 4.24           | 30–36             | 2                 | xho                    | —                | —                  | —              | —                 | —                 | —                      |
| k’                | 33.00            | 33.00              | 4.24           | 30–36             | 2                 | tsn, xho               | —                | —                  | —              | —                 | —                 | —                      |
| k <sup>w’</sup>   | 36.00            | 36.00              | —              | —                 | 1                 | tsn                    | —                | —                  | —              | —                 | —                 | —                      |
| ts’               | 36.33            | 36.00              | 6.51           | 30–43             | 3                 | tsn, xho               | —                | —                  | —              | —                 | —                 | —                      |
| ts <sup>w’</sup>  | 36.00            | 36.00              | —              | —                 | 1                 | tsn                    | —                | —                  | —              | —                 | —                 | —                      |
| tʃ’               | 54.50            | 54.50              | 7.78           | 49–60             | 2                 | xho                    | —                | —                  | —              | —                 | —                 | —                      |

| 75–89% criteria |                  |                    |                |                   |                   |                        | 90–100% criteria |                    |                |                   |                   |                        |
|-----------------|------------------|--------------------|----------------|-------------------|-------------------|------------------------|------------------|--------------------|----------------|-------------------|-------------------|------------------------|
| Consonant       | Mean<br>(months) | Median<br>(months) | SD<br>(months) | Range<br>(months) | No. of<br>studies | Languages <sup>a</sup> | Mean<br>(months) | Median<br>(months) | SD<br>(months) | Range<br>(months) | No. of<br>studies | Languages <sup>a</sup> |
| kx'             | 39.50            | 39.50              | 13.44          | 30–49             | 2                 | xho                    | —                | —                  | —              | —                 | —                 | —                      |

*Note.* SD = standard deviation; — = not acquired by the oldest child in the study, not assessed, or no variability.

<sup>a</sup>Language names are listed using the ISO 639—3:2007 standard abbreviations: afr = Afrikaans; ara = Arabic; cmn = Putonghua (Mandarin); dan = Danish; deu = German; ell = Greek; eng = English; fra = French; hat = Haitian Creole; heb = Hebrew; hun = Hungarian; isl = Icelandic; ita = Italian; jam = Jamaican Creole; jpn = Japanese; kor = Korean; mlt = Maltese; msa = Malay; nld = Dutch; pot = Portuguese; slv = Slovenian; spa = Spanish; swa = Swahili; tsn = Setswana; tur = Turkish; xho = Xhosa; yue = Cantonese.
